# Supplementary material
Source: MDPI journal article supplement (https://www.mdpi.com/2071-1050/13/22/12377)
Supplement: s1 [file s1]

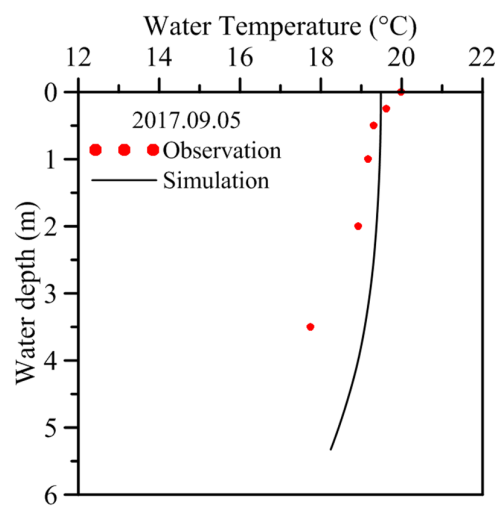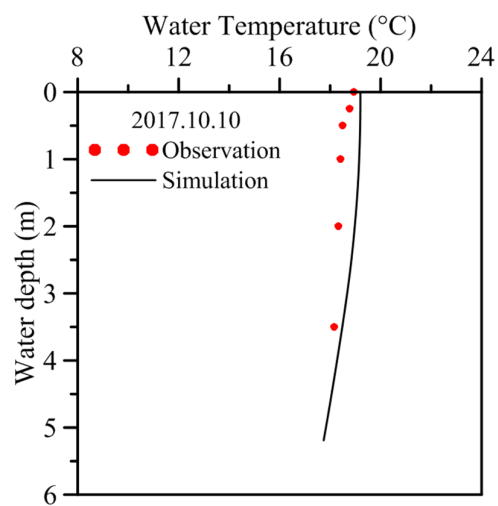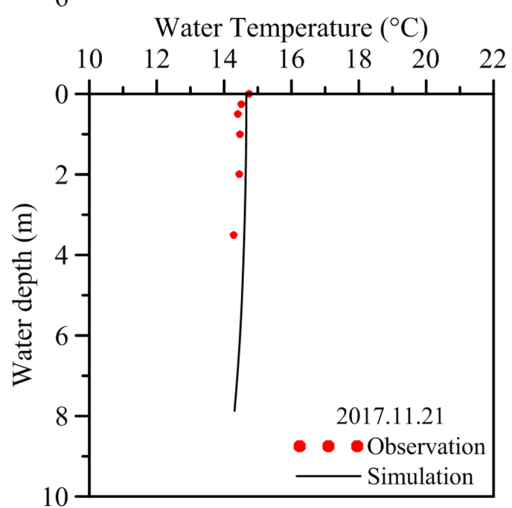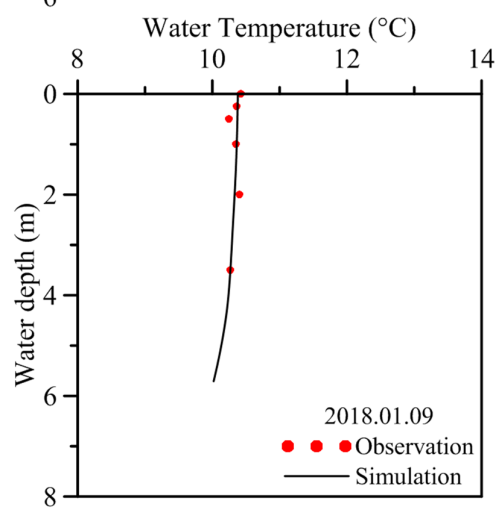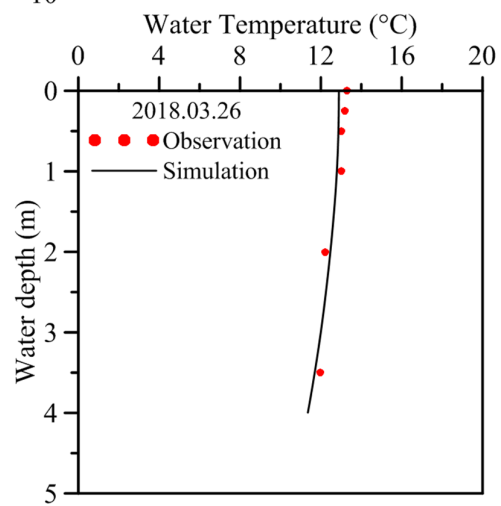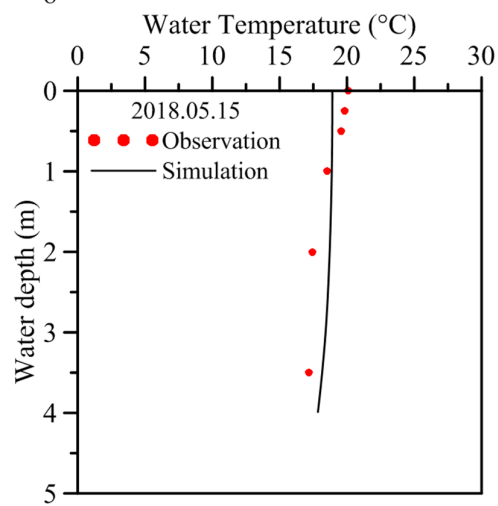

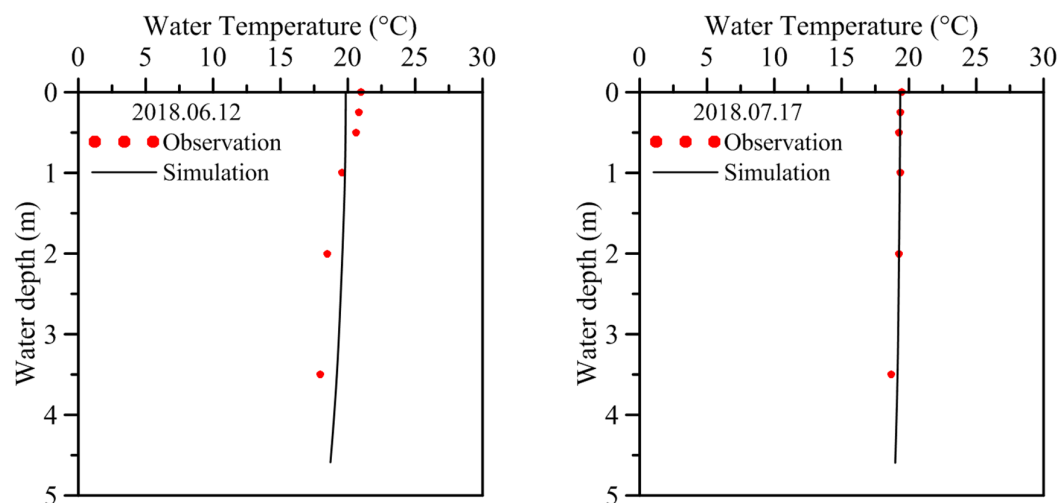

**Figure S1.** Comparison of vertical water temperature profiles between model simulations and observations at the buoy station in 2017 and 2018.

**Table S1.** Governing parameters, descriptions, values, and units adopted in the water quality-ecological model.

| Symbol   | Parameter                                                                                     | Value | Unit                                               | Reference                                    |
|----------|-----------------------------------------------------------------------------------------------|-------|----------------------------------------------------|----------------------------------------------|
| K_deox   | Deoxygenation rate                                                                            | 0.21  | day <sup>-1</sup>                                  | 0.16-0.21 [58]                               |
| K_nitr   | Nitrification rate                                                                            | 0.13  | day <sup>-1</sup>                                  | 0.09-0.13 [58]                               |
| K_deni   | Denitrification rate                                                                          | 0.05  | day <sup>-1</sup>                                  | 0.09 [58]                                    |
| K_mine1  | Organic nitrogen mineralization                                                               | 0.075 | day <sup>-1</sup>                                  | 0.075 [58]                                   |
| K_mine2  | Organic phosphorus mineralization                                                             | 0.15  | day <sup>-1</sup>                                  | 0.22 [58]                                    |
| KCOD     | Half-saturation constant of dissolved oxygen required for oxidation of chemical oxygen demand | 0.5   | mg O <sub>2</sub> L <sup>-1</sup>                  | 0.5 [58]                                     |
| KNITR    | Nitrification half-saturation constant for dissolved oxygen                                   | 0.5   | mg O <sub>2</sub> L <sup>-1</sup>                  | 0.5 [58]                                     |
| KNO3     | Denitrification half-saturation constant for dissolved oxygen                                 | 0.1   | mg O <sub>2</sub> L <sup>-1</sup>                  | 0.1 [58]                                     |
| KmN      | Half-saturation constant for uptake of inorganic nitrogen                                     | 25.0  | ug N L <sup>-1</sup>                               | 25.0 [58]                                    |
| KmP      | Half-saturation constant for uptake of inorganic phosphorus                                   | 1.0   | ug P L <sup>-1</sup>                               | 1.0 [58]                                     |
| SOD      | Sediment oxygen demand                                                                        | 0.4   | g O <sub>2</sub> m <sup>-2</sup> day <sup>-1</sup> | 0.2-4.0 [58]                                 |
| FON      | Fraction of dead and respired phytoplankton recycled to the organic nitrogen                  | 0.5   | -                                                  | 0.5 [58]                                     |
| FOP      | Fraction of dead and respired phytoplankton recycled to the organic phosphorus                | 0.65  | -                                                  | 0.5 [58]                                     |
| Solar_S  | Optimum solar radiation rate                                                                  | 250   | langley's day <sup>-1</sup>                        | 216-350 [55]<br>200-500 [58]                 |
| Ratio_NC | Ratio of nitrogen to carbon in phytoplankton                                                  | 0.25  | mg N mg <sup>-1</sup> C <sup>-1</sup>              | 0.25 [58]                                    |
| Ratio_PC | Ratio of phosphorus to carbon in phytoplankton                                                | 0.025 | mg P mg <sup>-1</sup> C <sup>-1</sup>              | 0.025 [58]                                   |
| KB_ds    | Organic carbon decomposition rate                                                             | 0.01  | day <sup>-1</sup>                                  | 0.004 [58]                                   |
| Dep_ben  | Benthic layer depth                                                                           | 0.5   | m                                                  | 0.2-0.7 [58]                                 |
| GZ       | Growth rate of zooplankton                                                                    | 0.76  | day <sup>-1</sup>                                  | 0.1-0.7 [57]<br>0.1-0.76 [55]                |
| BMZ      | Basal metabolism rate of zooplankton                                                          | 0.254 | day <sup>-1</sup>                                  | 0.24-1.2 [55]<br>0.17 [56,59]<br>0.001-0.125 |
| PRZ      | Mortality rate of zooplankton                                                                 | 0.02  | day <sup>-1</sup>                                  | [55]<br>0.02 [59]                            |
| GP       | Growth rate of phytoplankton                                                                  | 2.50  | day <sup>-1</sup>                                  | 0.2-8.0 [55]<br>2.0 [58]<br>2.0-5.5 [56,59]  |

|     |                                           |      |                     |                                           |
|-----|-------------------------------------------|------|---------------------|-------------------------------------------|
| BMP | Basal metabolism rate of<br>phytoplankton | 0.01 | day <sup>-1</sup>   | 0.003-0.17 [55]<br>0.02 [58]<br>0.01 [59] |
| PRP | Predation rate on phytoplankton           | 1.75 | day <sup>-1</sup>   | 0.02-2.28 [60]                            |
| WS  | Settling velocity of phytoplankton        | 0.01 | m day <sup>-1</sup> | 0.01-0.6 [55]<br>0.1 [58]                 |

---
